# Supplementary material
Source: PubMed Central journal article supplement (PMC7054510)
Supplement: 13197_2019_4158_MOESM1_ESM.pdf [file 13197_2019_4158_MOESM1_ESM.pdf]

Fig. S1. Chromatogram of equivalent carbon number of flax seed oil.

Fig. S2. Chromatogram of equivalent carbon number of perilla seed oil.

Fig. S3. Chromatogram of equivalent carbon number of basil seed (c) oil.

Fig. S4. DSC melting and crystallization thermograms of flax seed oil.

Fig. S5. DSC melting and crystallization thermograms of perilla seed oil.

Fig. S6. DSC melting and crystallization thermograms of basil seed oil.

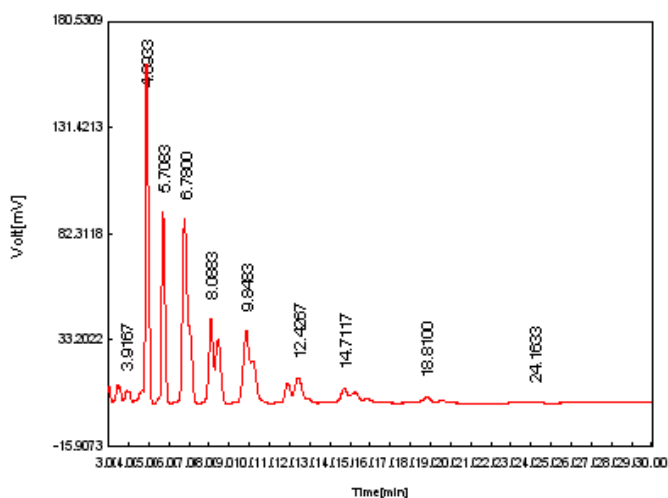

Fig. S1

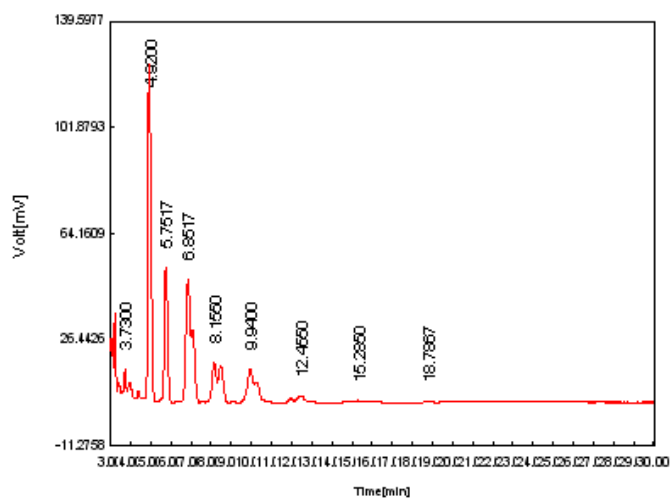

Fig. S2

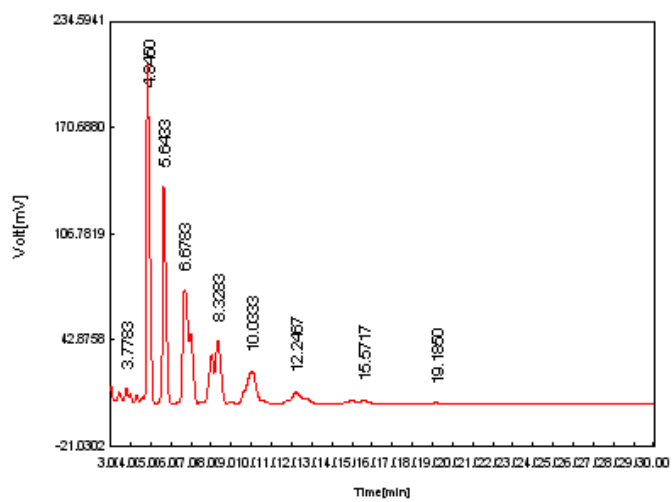

Fig. S3

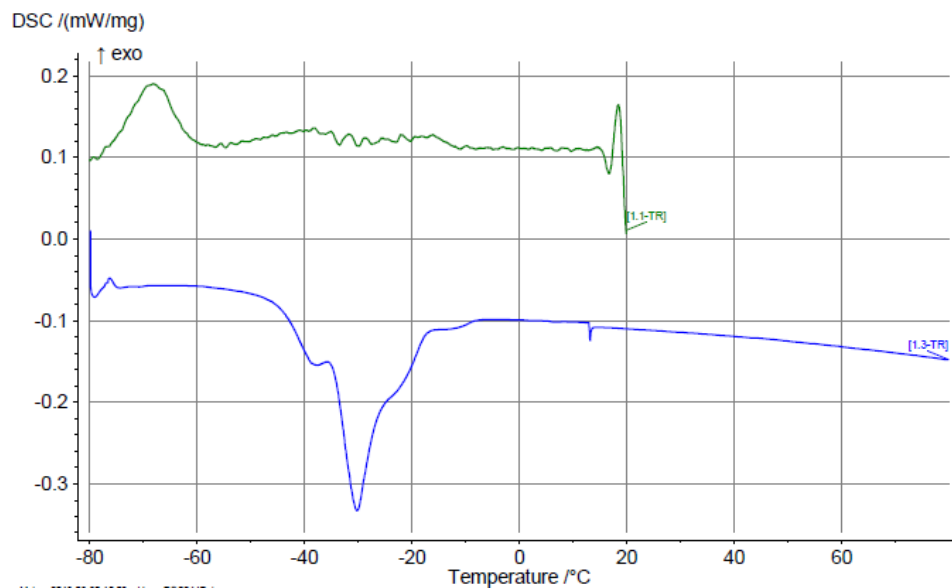

Fig. S4

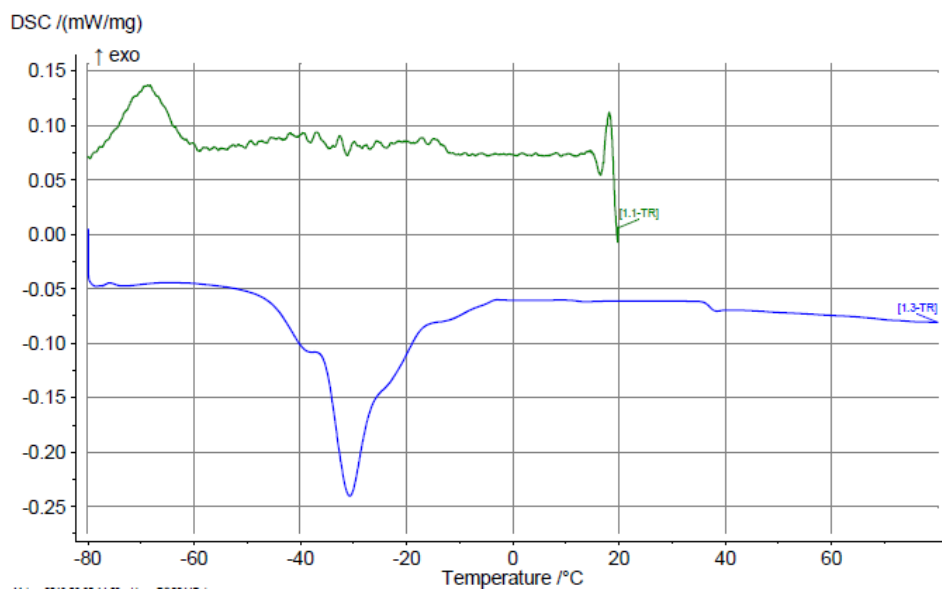

Fig. S5

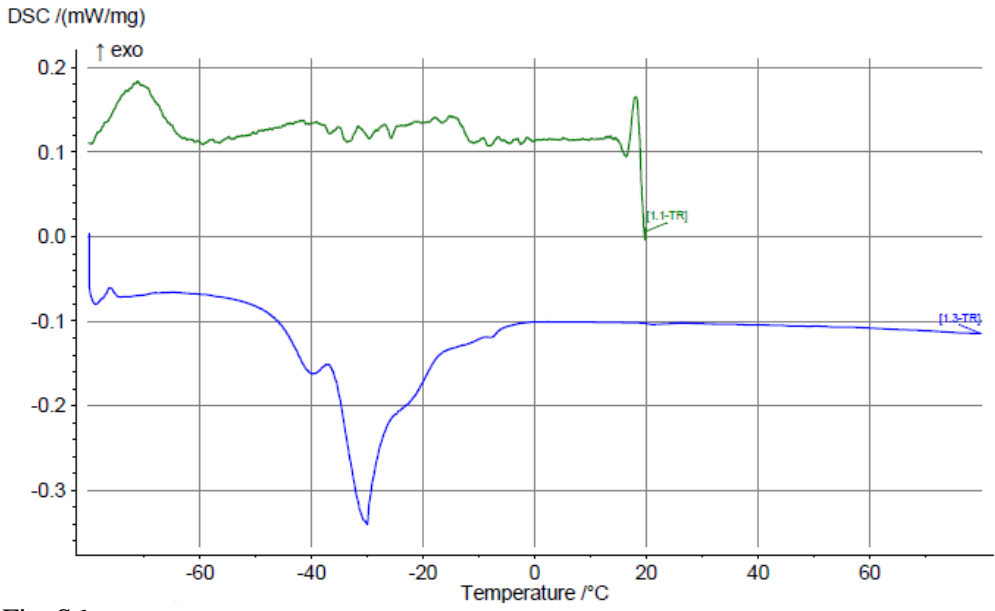

Fig. S6
